# Supplementary material for: Proenkephalin A 119–159 predicts early and successful liberation from renal replacement therapy in critically ill patients with acute kidney injury: a post hoc analysis of the ELAIN trial
Source: PubMed Central journal article supplement (PMC9624047; doi:10.1186/s13054-022-04217-4), 2022-10-31

(a)

### Successful liberation from RRT

cHR 1.97 (95% CI 1.35 – 2.89) p < 0.001 (logrank)

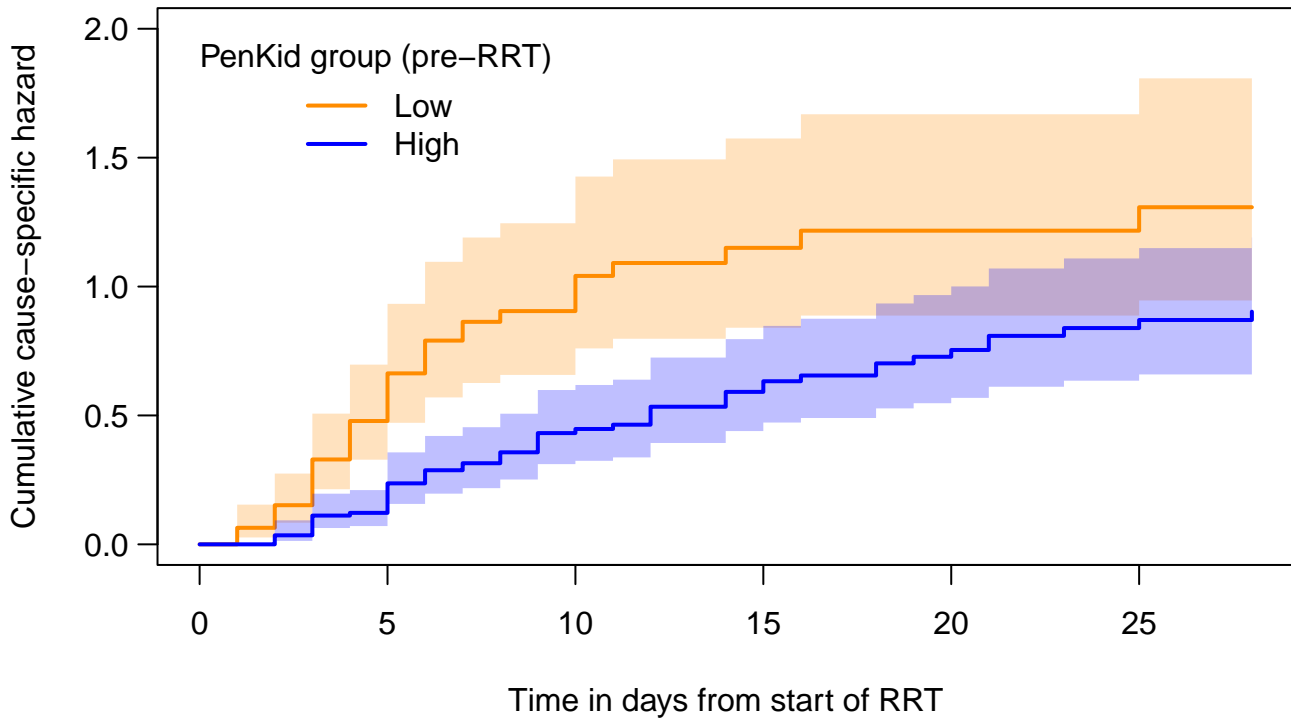

(b)

### Death without prior liberation from RRT

cHR 1.14 (95% CI 0.68 – 1.91) p = 0.609 (logrank)

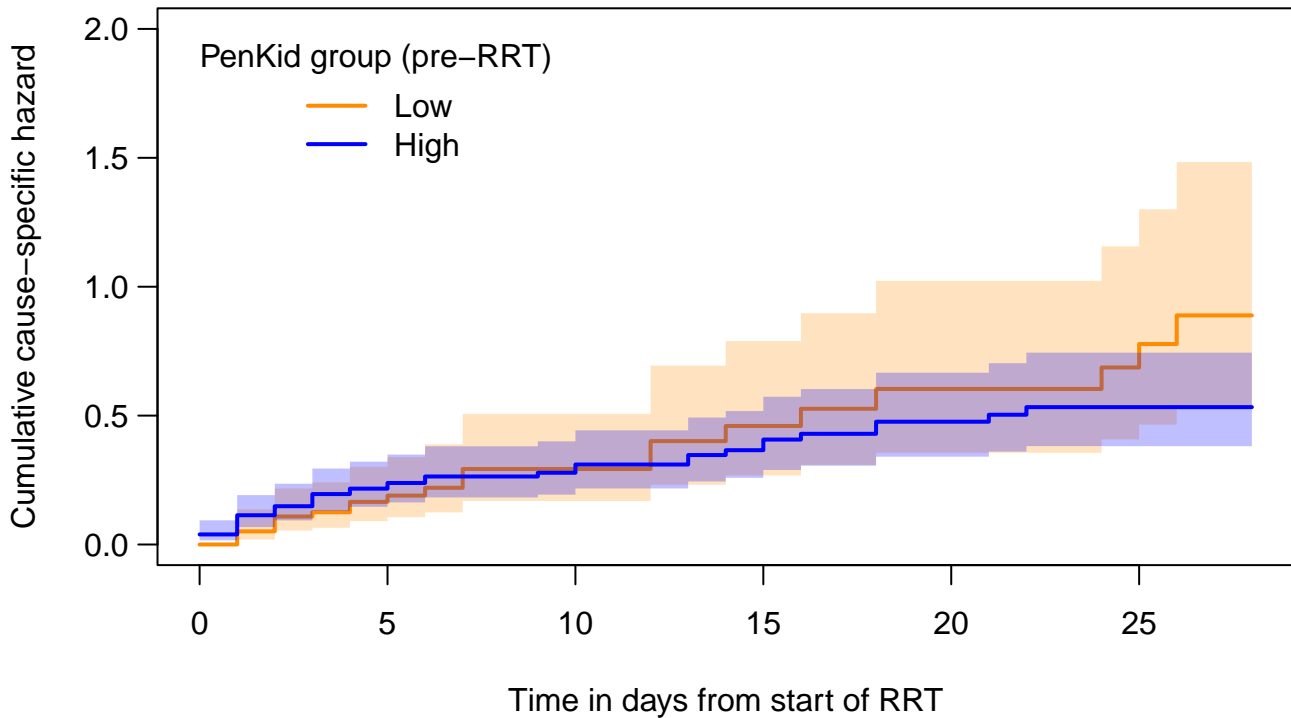

Supplement: 13054_2022_4217_MOESM2_ESM.pdf [file 13054_2022_4217_MOESM2_ESM.pdf]
