# Supplementary material for: Proenkephalin A 119–159 predicts early and successful liberation from renal replacement therapy in critically ill patients with acute kidney injury: a post hoc analysis of the ELAIN trial
Source: PubMed Central journal article supplement (PMC9624047; doi:10.1186/s13054-022-04217-4), 2022-10-31

**(a)**

### Successful liberation from RRT

cHR 2.09 (95% CI 1.34 – 3.26) p = 0.001 (logrank)

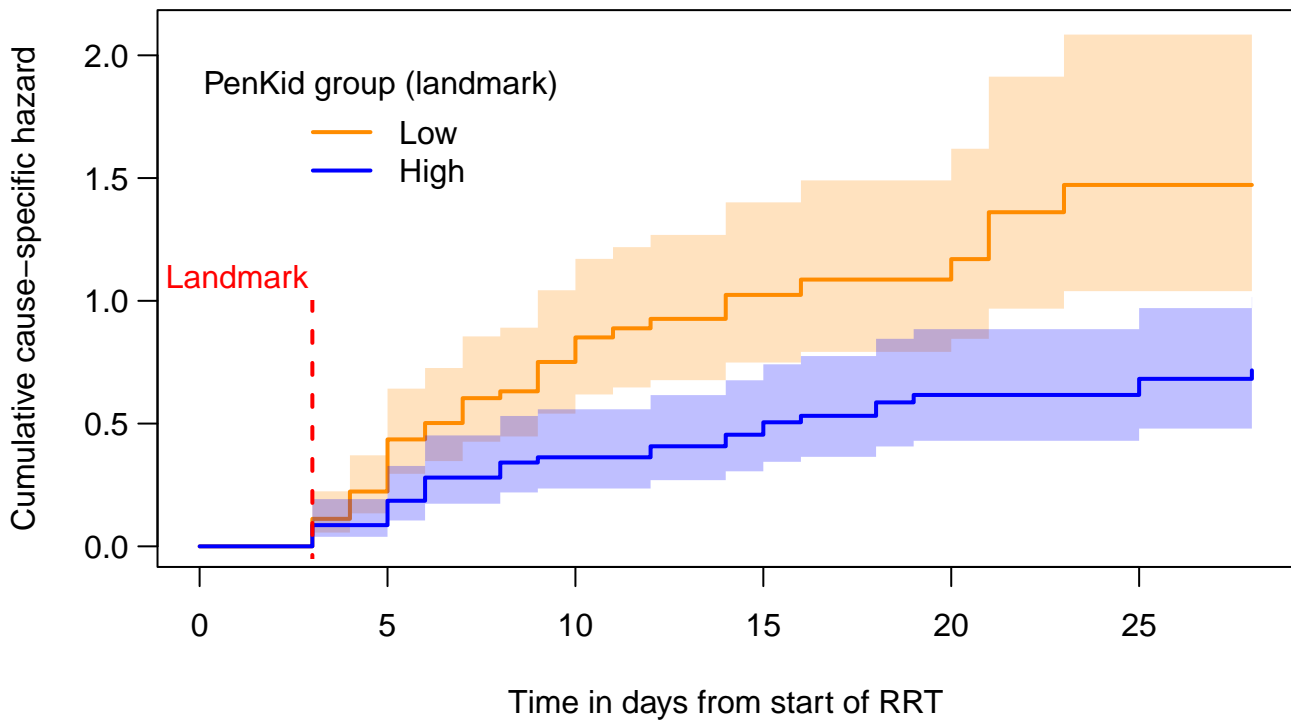**(b)**

### Death without prior liberation from RRT

cHR 3.39 (95% CI 1.55 – 7.42) p = 0.002 (logrank)

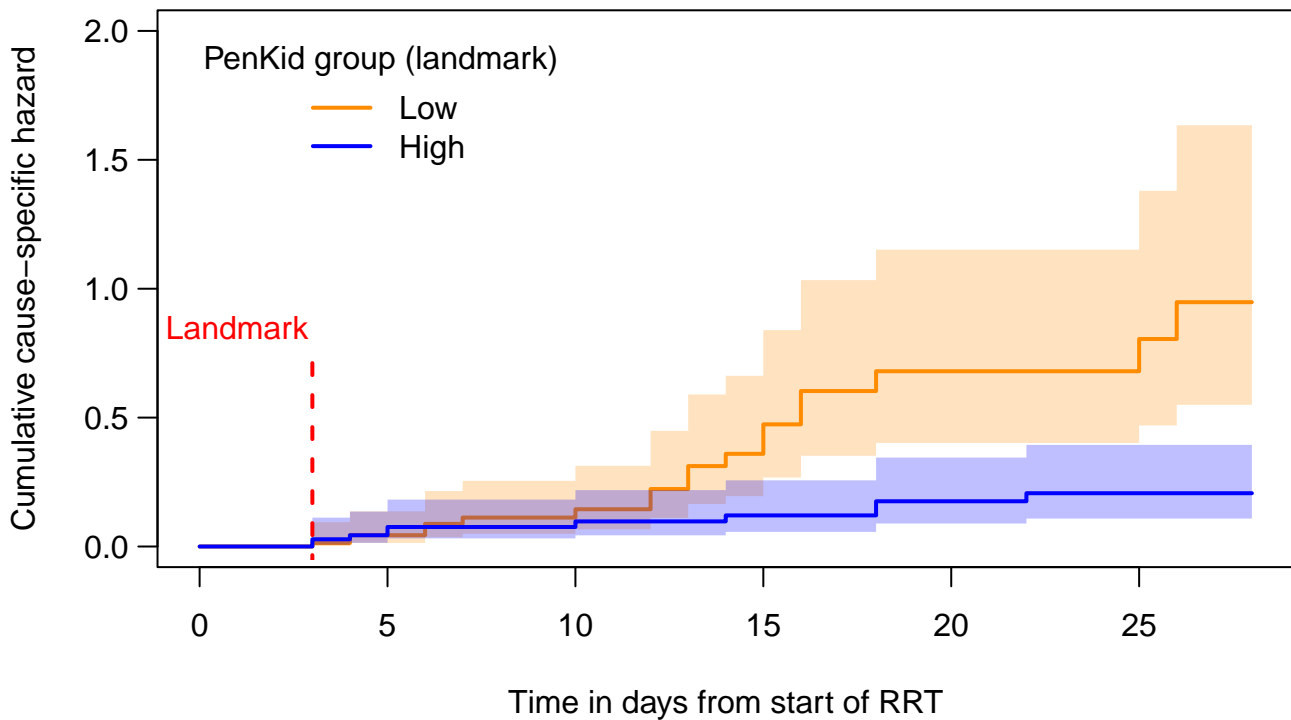

Supplement: 13054_2022_4217_MOESM3_ESM.pdf [file 13054_2022_4217_MOESM3_ESM.pdf]
