# Supplementary material for: Proenkephalin A 119–159 predicts early and successful liberation from renal replacement therapy in critically ill patients with acute kidney injury: a post hoc analysis of the ELAIN trial
Source: PubMed Central journal article supplement (PMC9624047; doi:10.1186/s13054-022-04217-4), 2022-10-31
Supplement: 13054_2022_4217_MOESM4_ESM.pdf [file 13054_2022_4217_MOESM4_ESM.pdf]

(a)

## Successful liberation from RRT

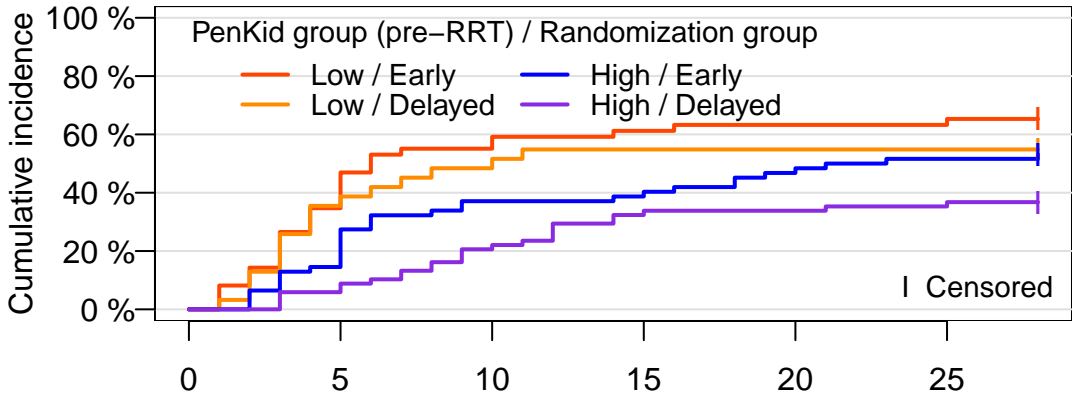

| At risk        | Time in days from start of RRT |    |    |    |    |    |    |    |    |    |    |
|----------------|--------------------------------|----|----|----|----|----|----|----|----|----|----|
| Low / Early    | 49                             | 37 | 18 | 13 | 11 | 11 | 8  | 7  | 7  | 5  | 4  |
| Low / Delayed  | 31                             | 24 | 15 | 10 | 8  | 6  | 5  | 5  | 5  | 4  | 4  |
| High / Early   | 62                             | 49 | 35 | 30 | 26 | 24 | 19 | 15 | 13 | 12 | 12 |
| High / Delayed | 68                             | 59 | 45 | 39 | 33 | 29 | 24 | 23 | 20 | 19 | 19 |

(b)

## Death without prior liberation from RRT

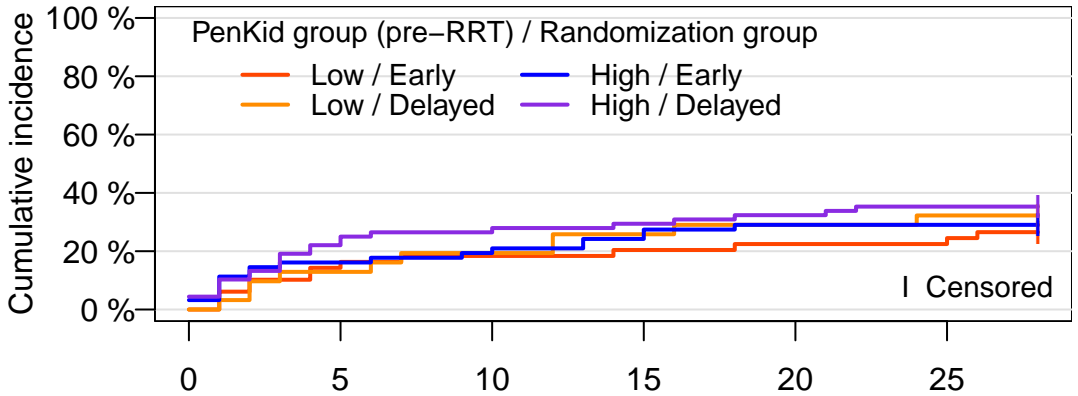

| At risk        | Time in days from start of RRT |    |    |    |    |    |    |    |    |    |    |
|----------------|--------------------------------|----|----|----|----|----|----|----|----|----|----|
| Low / Early    | 49                             | 37 | 18 | 13 | 11 | 11 | 8  | 7  | 7  | 5  | 4  |
| Low / Delayed  | 31                             | 24 | 15 | 10 | 8  | 6  | 5  | 5  | 5  | 4  | 4  |
| High / Early   | 62                             | 49 | 35 | 30 | 26 | 24 | 19 | 15 | 13 | 12 | 12 |
| High / Delayed | 68                             | 59 | 45 | 39 | 33 | 29 | 24 | 23 | 20 | 19 | 19 |
