# Supplementary material for: Proenkephalin A 119–159 predicts early and successful liberation from renal replacement therapy in critically ill patients with acute kidney injury: a post hoc analysis of the ELAIN trial
Source: PubMed Central journal article supplement (PMC9624047; doi:10.1186/s13054-022-04217-4), 2022-10-31

# ROC Curve "Successful liberation from RRT until day 28"

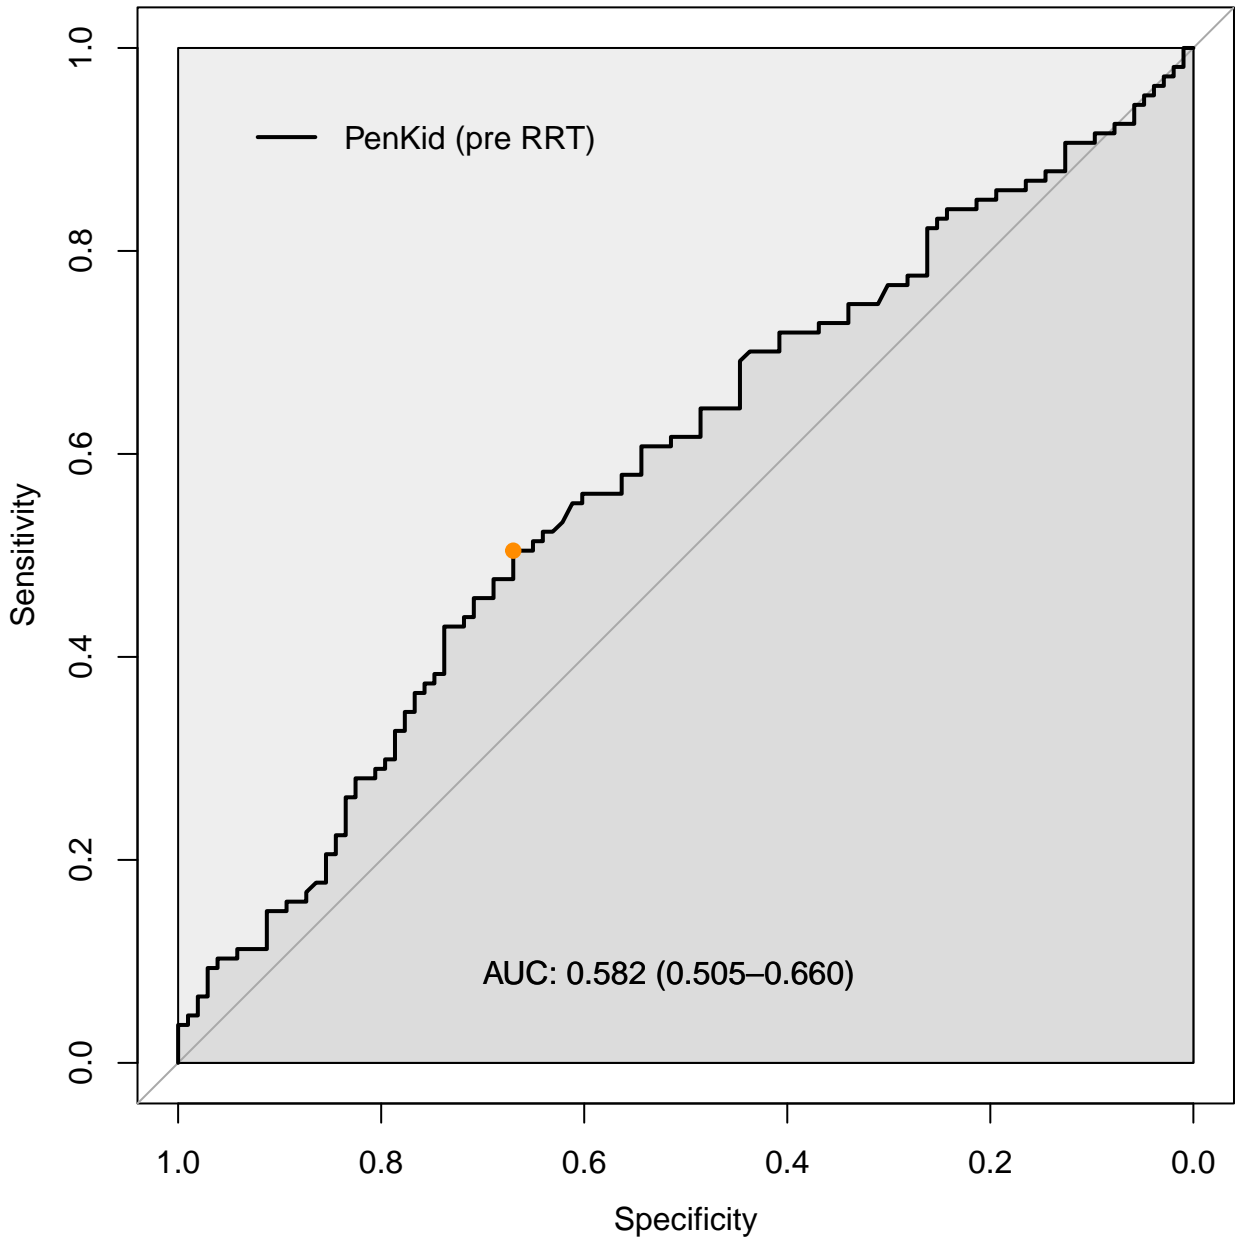

Supplement: 13054_2022_4217_MOESM6_ESM.pdf [file 13054_2022_4217_MOESM6_ESM.pdf]
