# Supplementary material for: Proenkephalin A 119–159 predicts early and successful liberation from renal replacement therapy in critically ill patients with acute kidney injury: a post hoc analysis of the ELAIN trial
Source: PubMed Central journal article supplement (PMC9624047; doi:10.1186/s13054-022-04217-4), 2022-10-31
Supplement: 13054_2022_4217_MOESM9_ESM.pdf [file 13054_2022_4217_MOESM9_ESM.pdf]

| Variable                                            | Total<br>(n=169)   | Low penKid ( $\leq 89$ pmol/l)<br>(n=75) | High penKid ( $> 89$ pmol/l)<br>(n=72) | p-value             | Missing penKid<br>(n=22) |
|-----------------------------------------------------|--------------------|------------------------------------------|----------------------------------------|---------------------|--------------------------|
| <b>Sex</b>                                          |                    |                                          |                                        |                     |                          |
| Male                                                | 108 (63.9%)        | 50 (66.7%)                               | 48 (66.7%)                             | 1.000 <sup>a</sup>  | 10 (45.5%)               |
| Female                                              | 61 (36.1%)         | 25 (33.3%)                               | 24 (33.3%)                             |                     | 12 (54.5%)               |
| <b>Age (years)</b>                                  |                    |                                          |                                        |                     |                          |
| Median (Q1, Q3)                                     | 69.0 (58.0, 75.0)  | 69.0 (59.0, 73.5)                        | 70.0 (55.8, 77.0)                      | 0.489 <sup>b</sup>  | 69.5 (63.5, 74.0)        |
| Mean (SD)                                           | 65.7 (13.5)        | 65.8 (11.6)                              | 65.5 (15.3)                            |                     | 66.0 (14.1)              |
| <b>Creatinine (mg/dl)</b>                           |                    |                                          |                                        |                     |                          |
| Median (Q1, Q3)                                     | 1.10 (0.800, 1.40) | 1.00 (0.800, 1.28)                       | 1.20 (0.900, 1.55)                     | 0.010 <sup>b</sup>  | 0.950 (0.800, 1.23)      |
| Mean (SD)                                           | 1.14 (0.414)       | 1.06 (0.393)                             | 1.25 (0.430)                           |                     | 1.02 (0.339)             |
| Missing                                             | 4 (2.4%)           | 1 (1.3%)                                 | 1 (1.4%)                               |                     | 2 (9.1%)                 |
| <b>Estimated GFR (ml/min/1.73m<sup>2</sup>)</b>     |                    |                                          |                                        |                     |                          |
| Median (Q1, Q3)                                     | 53.0 (41.0, 80.5)  | 66.0 (55.0, 113)                         | 42.5 (35.3, 50.0)                      | <0.001 <sup>b</sup> | NA                       |
| Mean (SD)                                           | 73.1 (64.4)        | 95.7 (80.7)                              | 49.7 (25.7)                            |                     | NA                       |
| Missing                                             | 26 (15.4%)         | 2 (2.7%)                                 | 2 (2.8%)                               |                     | 22 (100%)                |
| <b>SOFA score</b>                                   |                    |                                          |                                        |                     |                          |
| Median (Q1, Q3)                                     | 14.0 (13.0, 16.0)  | 14.0 (13.0, 15.5)                        | 14.0 (12.0, 16.0)                      | 0.795 <sup>b</sup>  | 14.5 (13.0, 16.0)        |
| Mean (SD)                                           | 14.0 (2.80)        | 14.1 (2.54)                              | 14.1 (2.93)                            |                     | 13.8 (3.28)              |
| <b>APACHE II</b>                                    |                    |                                          |                                        |                     |                          |
| Median (Q1, Q3)                                     | 25.0 (20.0, 30.0)  | 24.0 (20.0, 28.5)                        | 25.0 (19.0, 31.3)                      | 0.553 <sup>b</sup>  | 26.5 (21.0, 34.5)        |
| Mean (SD)                                           | 25.6 (7.39)        | 25.0 (6.64)                              | 25.7 (7.98)                            |                     | 27.1 (7.93)              |
| <b>Hypertension</b>                                 |                    |                                          |                                        |                     |                          |
| Yes                                                 | 140 (82.8%)        | 67 (89.3%)                               | 58 (80.6%)                             | 0.168 <sup>a</sup>  | 15 (68.2%)               |
| No                                                  | 29 (17.2%)         | 8 (10.7%)                                | 14 (19.4%)                             |                     | 7 (31.8%)                |
| <b>Diabetes</b>                                     |                    |                                          |                                        |                     |                          |
| Yes                                                 | 31 (18.3%)         | 12 (16.0%)                               | 13 (18.1%)                             | 0.828 <sup>a</sup>  | 6 (27.3%)                |
| No                                                  | 138 (81.7%)        | 63 (84.0%)                               | 59 (81.9%)                             |                     | 16 (72.7%)               |
| <b>Chronic obstructive pulmonary disease (COPD)</b> |                    |                                          |                                        |                     |                          |
| Yes                                                 | 25 (14.8%)         | 16 (21.3%)                               | 7 (9.7%)                               | 0.069 <sup>a</sup>  | 2 (9.1%)                 |
| No                                                  | 144 (85.2%)        | 59 (78.7%)                               | 65 (90.3%)                             |                     | 20 (90.9%)               |
| <b>Vasopressors</b>                                 |                    |                                          |                                        |                     |                          |
| Yes                                                 | 152 (89.9%)        | 69 (92.0%)                               | 64 (88.9%)                             | 0.583 <sup>a</sup>  | 19 (86.4%)               |
| No                                                  | 17 (10.1%)         | 6 (8.0%)                                 | 8 (11.1%)                              |                     | 3 (13.6%)                |
| <b>Kidney biomarker NGAL (ng/ml)</b>                |                    |                                          |                                        |                     |                          |
| Median (Q1, Q3)                                     | 557 (381, 935)     | 576 (368, 1040)                          | 559 (403, 809)                         | 0.653 <sup>b</sup>  | 545 (379, 955)           |
| Mean (SD)                                           | 671 (361)          | 695 (384)                                | 648 (326)                              |                     | 663 (396)                |
